# Supplementary material for: Seismic Fragility Functions for Non-Seismically Designed RC Structures Considering Pounding Effects
Source: MDPI journal article supplement (doi:10.3390/buildings11120665), 2021-12-20
Supplement: s1 [file s1]

**Table S1.** Characteristics of the selected ground motions

| Name                  | Year | M    | PGA (g) | Aver. Sa (g) | Depth km | Name                  | Year | M    | PGA (g) | Aver. Sa (g) | Depth km |
|-----------------------|------|------|---------|--------------|----------|-----------------------|------|------|---------|--------------|----------|
| Imperial Valley-06    | 1979 | 6.53 | 0.351   | 0.510        | 33.73    | Chi-Chi, Taiwan       | 1999 | 7.62 | 0.223   | 0.451        | 41.2     |
| Imperial Valley-02    | 1940 | 6.95 | 0.215   | 0.457        | 12.99    | Imperial Valley-06    | 1979 | 6.53 | 0.220   | 0.424        | 43.15    |
| Northridge-01         | 1994 | 6.69 | 0.322   | 0.440        | 25.44    | Chi-Chi, Taiwan       | 1999 | 7.62 | 0.225   | 0.542        | 25.57    |
| Chi-Chi, Taiwan       | 1999 | 7.62 | 0.128   | 0.356        | 63.29    | Imperial Valley-06    | 1979 | 6.53 | 0.143   | 0.224        | 31.99    |
| Chi-Chi, Taiwan-04    | 1999 | 6.2  | 0.100   | 0.241        | 50.36    | Chi-Chi, Taiwan       | 1999 | 7.62 | 0.821   | 1.506        | 32.67    |
| Coalinga-01           | 1983 | 6.36 | 0.114   | 0.271        | 55.67    | Superstition Hills-02 | 1987 | 6.54 | 0.172   | 0.336        | 19.51    |
| Northridge-01         | 1994 | 6.69 | 0.242   | 0.468        | 16.99    | Landers               | 1992 | 7.28 | 0.146   | 0.288        | 75.2     |
| Chi-Chi, Taiwan       | 1999 | 7.62 | 0.220   | 0.399        | 21.8     | Imperial Valley-06    | 1979 | 6.53 | 0.116   | 0.183        | 31.99    |
| Northridge-01         | 1994 | 6.69 | 0.127   | 0.229        | 24.13    | Chi-Chi, Taiwan       | 1999 | 7.62 | 0.225   | 0.333        | 38.53    |
| Landers               | 1992 | 7.28 | 0.115   | 0.259        | 75.2     | Chi-Chi, Taiwan       | 1999 | 7.62 | 0.201   | 0.529        | 45.37    |
| Taiwan SMART1(40)     | 1986 | 6.32 | 0.183   | 0.264        | 65.48    | Kocaeli, Turkey       | 1999 | 7.51 | 0.244   | 0.299        | 47.03    |
| Chi-Chi, Taiwan       | 1999 | 7.62 | 0.184   | 0.239        | 43.31    | Northridge-01         | 1994 | 6.69 | 0.186   | 0.224        | 31.73    |
| Loma Prieta           | 1989 | 6.93 | 0.278   | 0.460        | 51.2     | Northridge-01         | 1994 | 6.69 | 0.210   | 0.289        | 33.25    |
| Loma Prieta           | 1989 | 6.93 | 0.126   | 0.242        | 35.47    | Northridge-01         | 1994 | 6.69 | 0.159   | 0.218        | 29.59    |
| Chi-Chi, Taiwan       | 1999 | 7.62 | 0.603   | 1.592        | 26.67    | Chi-Chi, Taiwan       | 1999 | 7.62 | 0.111   | 0.202        | 81.1     |
| Loma Prieta           | 1989 | 6.93 | 0.587   | 0.800        | 18.46    | Taiwan SMART1(45)     | 1986 | 7.3  | 0.136   | 0.270        | 71.35    |
| Manjil, Iran          | 1990 | 7.37 | 0.132   | 0.257        | 77.84    | Northridge-01         | 1994 | 6.69 | 0.184   | 0.327        | 32.72    |
| Superstition Hills-02 | 1987 | 6.54 | 0.156   | 0.215        | 29.91    | Northridge-01         | 1994 | 6.69 | 0.164   | 0.346        | 25.42    |
| Loma Prieta           | 1989 | 6.93 | 0.192   | 0.216        | 55.16    | Imperial Valley-06    | 1979 | 6.53 | 0.410   | 0.763        | 27.47    |
| Coyote Lake           | 1979 | 5.74 | 0.107   | 0.253        | 23.24    | Chi-Chi, Taiwan       | 1999 | 7.62 | 0.166   | 0.303        | 79.2     |
| Chi-Chi, Taiwan-03    | 1999 | 6.2  | 0.146   | 0.254        | 32.39    | Chi-Chi, Taiwan-04    | 1999 | 6.2  | 0.144   | 0.278        | 39.86    |
| Chi-Chi, Taiwan       | 1999 | 7.62 | 0.182   | 0.383        | 55.23    | Chi-Chi, Taiwan       | 1999 | 7.62 | 0.148   | 0.336        | 24.41    |
| Imperial Valley-06    | 1979 | 6.53 | 0.485   | 0.647        | 27.13    | Chi-Chi, Taiwan       | 1999 | 7.62 | 0.193   | 0.313        | 25.57    |
| Chi-Chi, Taiwan       | 1999 | 7.62 | 0.114   | 0.197        | 101.62   | Imperial Valley-06    | 1979 | 6.53 | 0.480   | 0.756        | 27.23    |
| Chalfant Valley-02    | 1986 | 6.19 | 0.177   | 0.341        | 31.25    | Northridge-01         | 1994 | 6.69 | 0.444   | 0.642        | 12.35    |

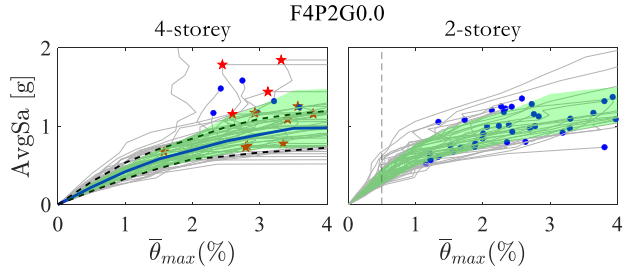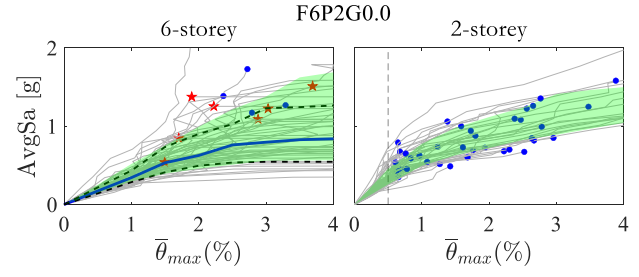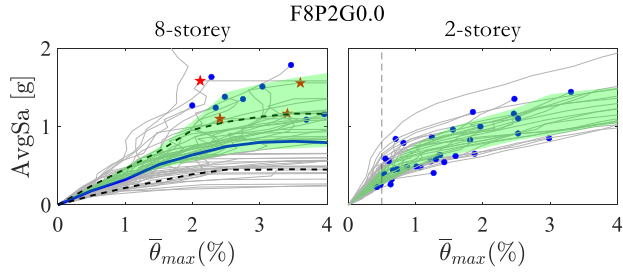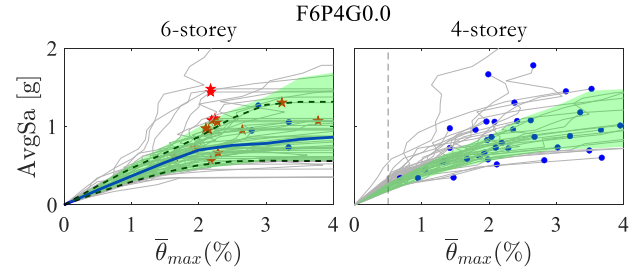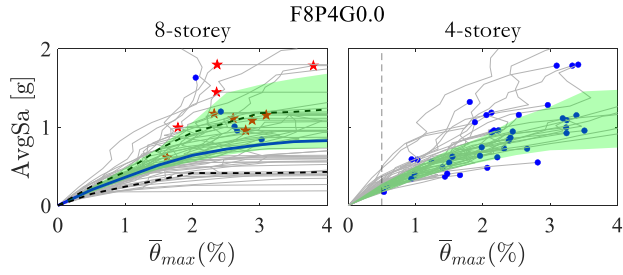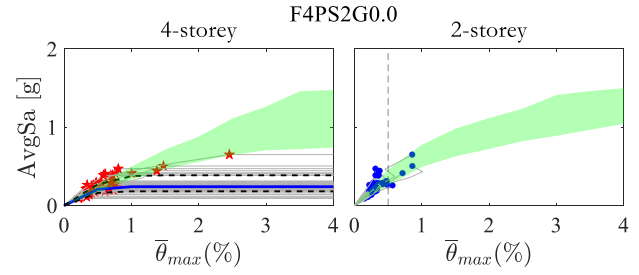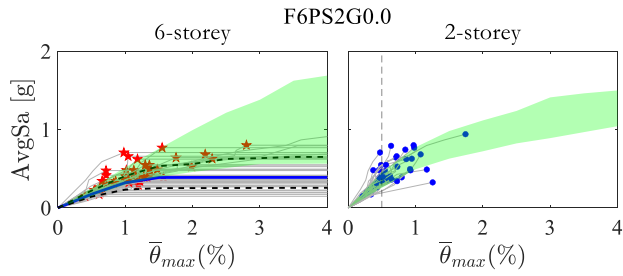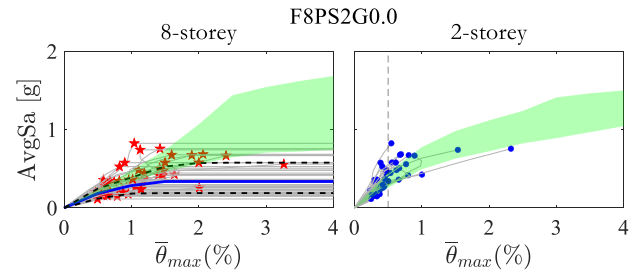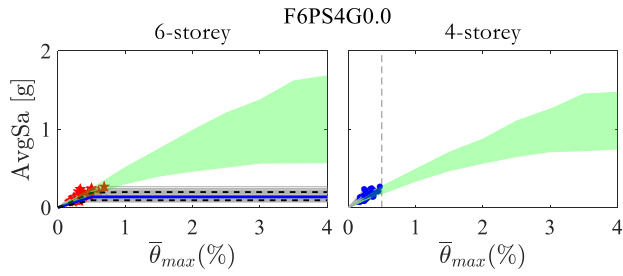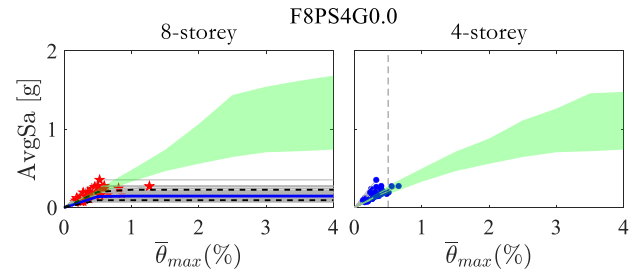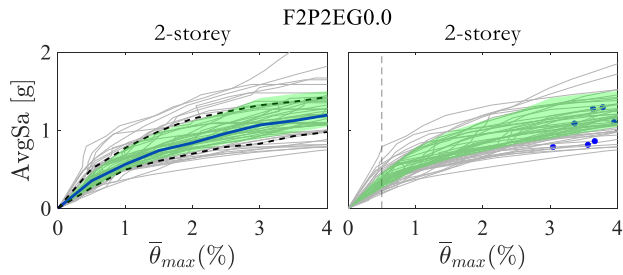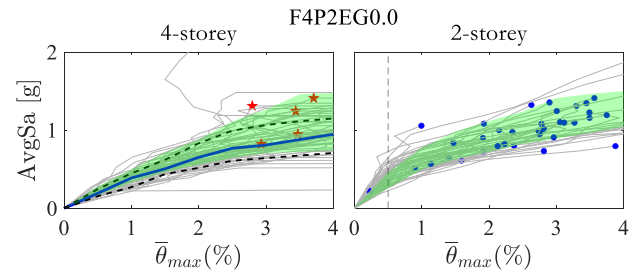

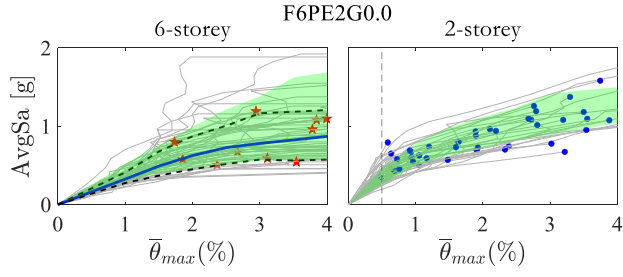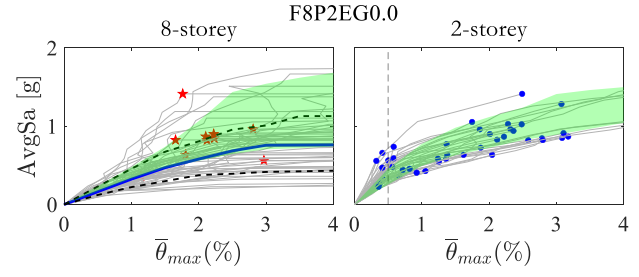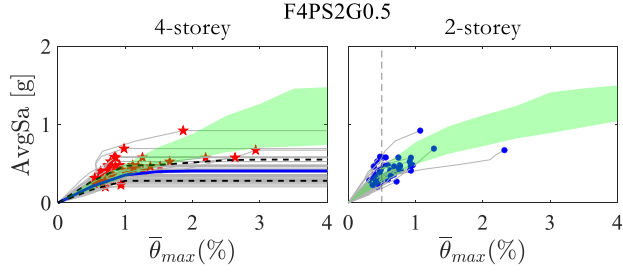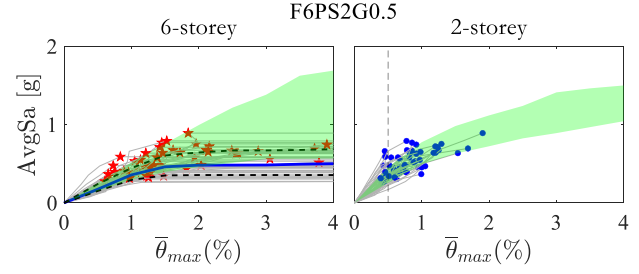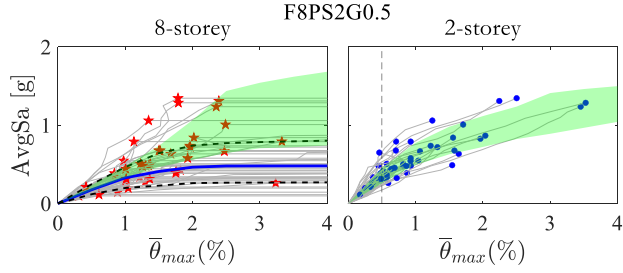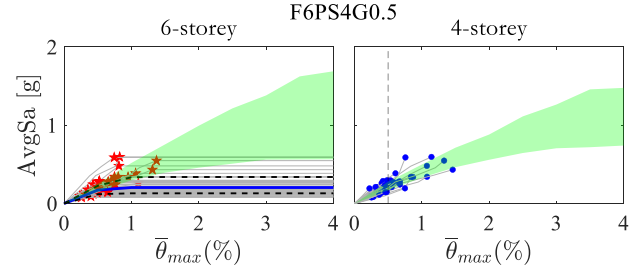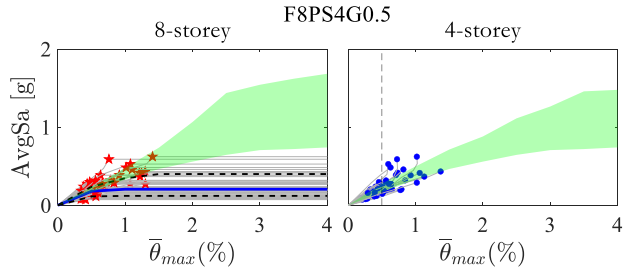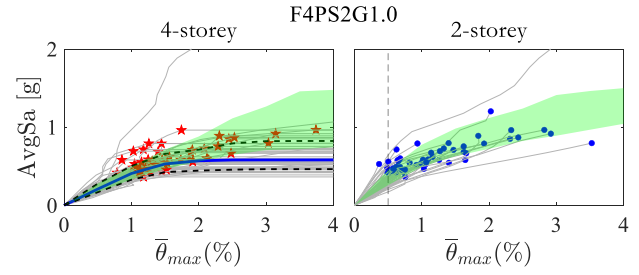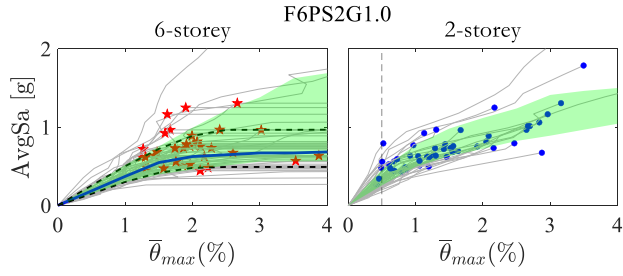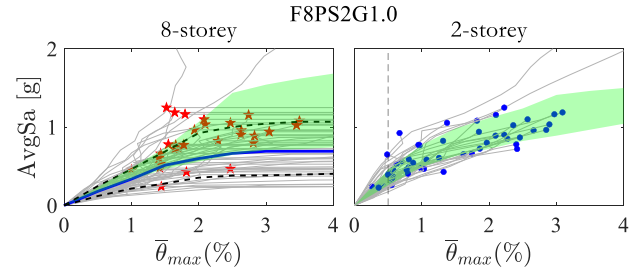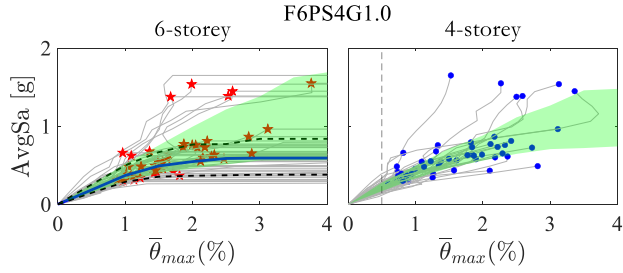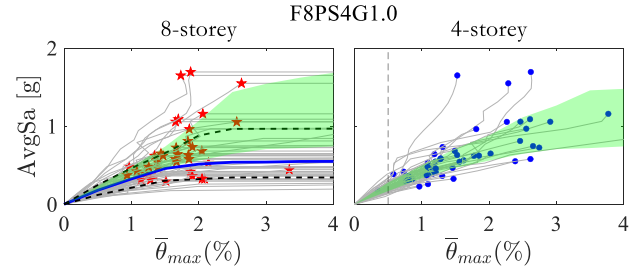

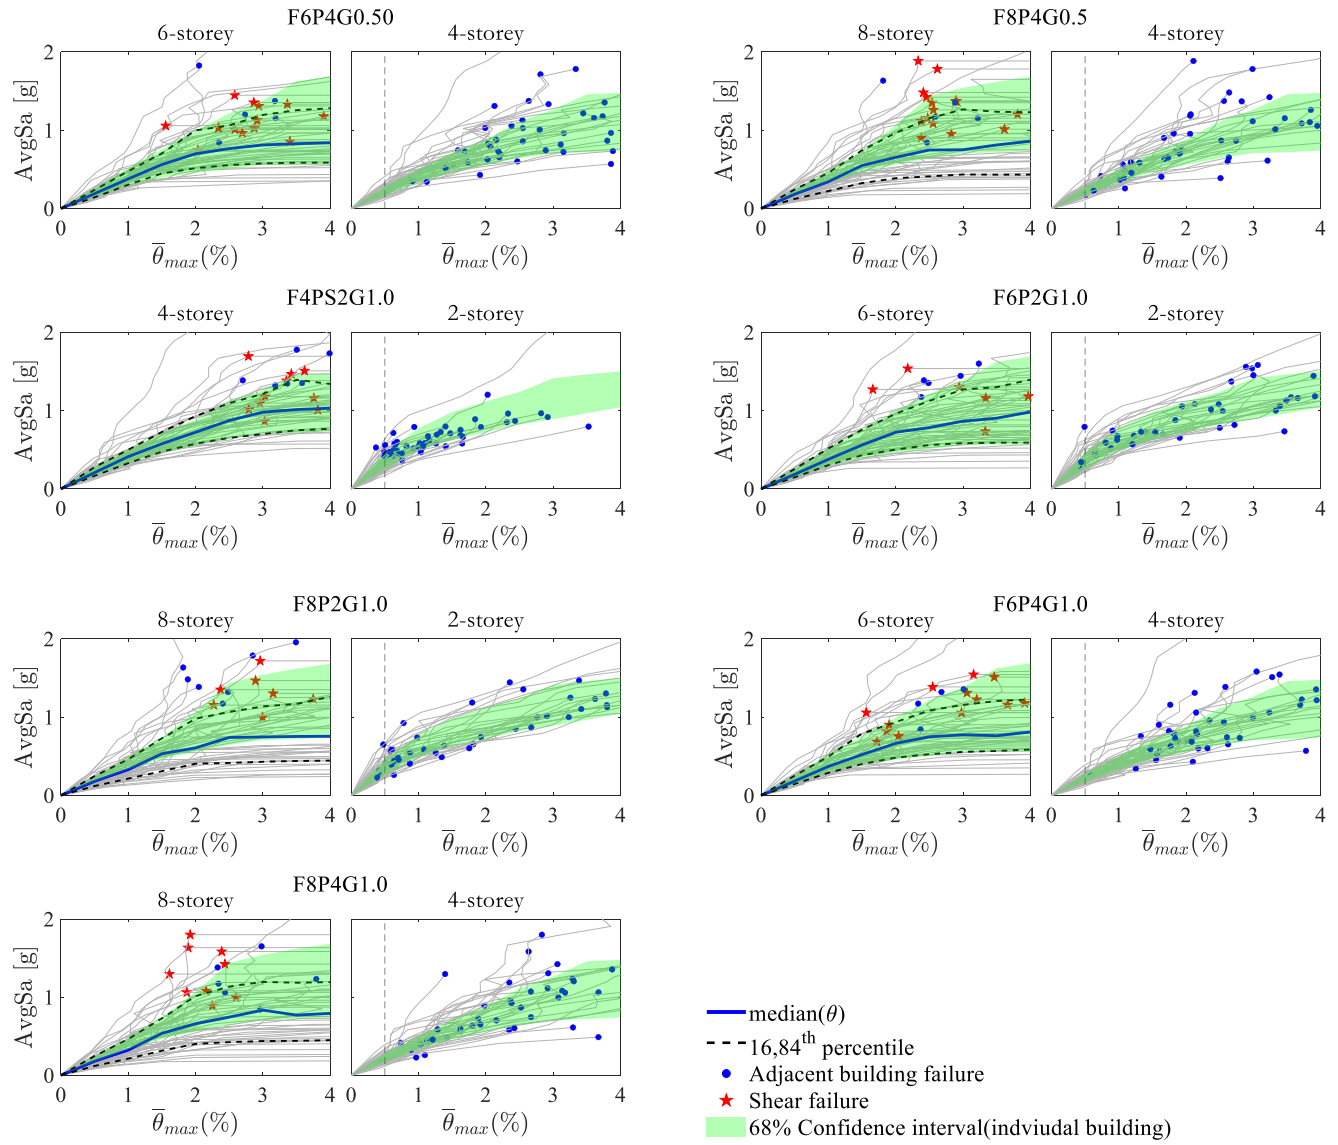

**Figure S1.** IDA curves obtained for all considered pounding configurations (continued).
